# Supplementary material for: Transmission and containment of the SARS-CoV-2 Delta variant of concern in Guangzhou, China: A population-based study
Source: PLoS Negl Trop Dis. 2022 Jan 5;16(1):e0010048. doi: 10.1371/journal.pntd.0010048 (PMC8730460; doi:10.1371/journal.pntd.0010048)
Supplement: S11 Table — (XLSX) [file pntd.0010048.s013.xlsx]

## Sheet: Sheet1
S11 Table. Results of the model which examined the association between age and incubation period with an adjustment of type of exposure.
Variables	Coefficient (95% confidence interval)	t	P
Age	0.006 (0.003-0.010)	3.648	<0.001
Calendar time	0.072 (0.052-0.091)	7.128	<0.001
Type of exposure
Family	Reference
Exposure to the same restaurant with a confirmed case	0.005 (-0.168-0.178)	0.056	0.955
Others	-0.323 (-0.552--0.084)	-2.688	0.009
Note. Sample size was 78.
